# Supplementary material
Source: publisher site journal article supplement (https://www.dovepress.com/article/464709)
Supplement: Supplementary file 1 [file get_supplementary_file.php]

### **Table S1. Liver hepatocellular carcinoma（LIHC）Dataset Information list.**

|  | TCGA-LIHC | GSE25097 | GSE46408 | GSE84402 |
| --- | --- | --- | --- | --- |
| Platform |  | GPL10687 | GPL4133 | GPL570 |
| Species | Homo sapiens | Homo sapiens | Homo sapiens | Homo sapiens |
| Samples in Normal group | 50 | 243 | 6 | 14 |
| Samples in LIHC group | 374 | 268 | 6 | 14 |
| Reference |  | [12] | [7] | [8] |

LIHC: Liver hepatocellular carcinoma.

### **Table S2. GO enrichment analysis results of NMRDEGs.**

| Ontology | ID | Description | GeneRatio | BgRatio | pvalue | p. adjust |
| --- | --- | --- | --- | --- | --- | --- |
| BP | GO: 0072524 | pyridine-containing compound metabolic process | 15/33 | 38/18800 | 1.6e-33 | 1.9e-30 |
| BP | GO: 0019362 | pyridine nucleotide metabolic process | 14/33 | 32/18800 | 4.83e-32 | 1.92e-29 |
| BP | GO: 0046496 | nicotinamide nucleotide metabolic process | 14/33 | 32/18800 | 4.83e-32 | 1.92e-29 |
| BP | GO: 0019359 | nicotinamide nucleotide biosynthetic process | 13/33 | 28/18800 | 3.61e-30 | 8.61e-28 |
| BP | GO: 0019363 | pyridine nucleotide biosynthetic process | 13/33 | 28/18800 | 3.61e-30 | 8.61e-28 |
| MF | GO: 0016763 | pentosyltransferase activity | 8/33 | 49/18410 | 1.82e-14 | 2.21e-12 |
| MF | GO: 0008253 | 5'-nucleotidase activity | 5/33 | 13/18410 | 1.72e-11 | 1.04e-09 |
| MF | GO: 0008252 | Nucleotidase activity | 5/33 | 15/18410 | 4e-11 | 1.61e-09 |
| MF | GO: 1990404 | NAD+-protein ADP-ribosyltransferase activity | 5/33 | 20/18410 | 2.05e-10 | 6.2e-09 |
| MF | GO: 0003950 | NAD+ ADP-ribosyltransferase activity | 5/33 | 23/18410 | 4.43e-10 | 1.07e-08 |

NMRDEGs: Nicotinamide metabolism-related differentially expressed genes.

GO: Gene Ontology. BP: biological process. CC: cellular component. MF: molecular function.

### **Table S3. KEGG enrichment analysis results of NMR DEGs.**

| Ontology | ID | Description | GeneRatio | BgRatio | pvalue | p. adjust |
| --- | --- | --- | --- | --- | --- | --- |
| KEGG | hsa00760 | Nicotinate and nicotinamide metabolism | 21/27 | 36/8164 | 6.05e-48 | 3.21e-46 |
| KEGG | hsa01232 | Nucleotide metabolism | 8/27 | 85/8164 | 1.87e-10 | 4.95e-09 |
| KEGG | hsa00240 | Pyrimidine metabolism | 7/27 | 58/8164 | 5e-10 | 8.84e-09 |
| KEGG | hsa00230 | Purine metabolism | 7/27 | 128/8164 | 1.35e-07 | 1.79e-06 |
| KEGG | hsa01240 | Biosynthesis of cofactors | 5/27 | 153/8164 | 0.0001 | 0.0013 |

NMRDEGs: Nicotinamide metabolism-related differentially expressed genes.

KEGG: Kyoto Encyclopedia of Genes and Genomes .

### **Table S4. GSEA analysis of TCGA-LIHC.**

| ID | setSize | enrichmentScore | NES | pvalue | p. adjust | qvalue |
| --- | --- | --- | --- | --- | --- | --- |
| REACTOME_COMPLEMENT_CASCADE | 57 | -0.8375431 | -3.255242 | 1e-10 | 5.99e-09 | 4.48e-09 |
| KEGG_RETINOL_METABOLISM | 62 | -0.8132315 | -3.197013 | 1e-10 | 5.99e-09 | 4.48e-09 |
| KEGG_DRUG_METABOLISM_CYTOCHROME_P450 | 69 | -0.7682903 | -3.041438 | 1e-10 | 5.99e-09 | 4.48e-09 |
| REACTOME_BIOLOGICAL_OXIDATIONS | 217 | -0.6284499 | -3.004459 | 1e-10 | 5.99e-09 | 4.48e-09 |
| REACTOME_DRUG_ADME | 95 | -0.7079259 | -2.973698 | 1e-10 | 5.99e-09 | 4.48e-09 |
| KEGG_COMPLEMENT_AND_COAGULATION_CASCADES | 69 | -0.7448710 | -2.948727 | 1e-10 | 5.99e-09 | 4.48e-09 |
| REACTOME_ASPIRIN_ADME | 42 | -0.7907808 | -2.886034 | 1e-10 | 5.99e-09 | 4.48e-09 |
| WP_COMPLEMENT_AND_COAGULATION_CASCADES | 58 | -0.7388804 | -2.876955 | 1e-10 | 5.99e-09 | 4.48e-09 |
| KEGG_METABOLISM_OF_XENOBIOTICS_BY_CYTOCHROME_P450 | 67 | -0.7263567 | -2.861686 | 1e-10 | 5.99e-09 | 4.48e-09 |
| REACTOME_PHASE_I_FUNCTIONALIZATION_OF_COMPOUNDS | 104 | -0.6638046 | -2.838928 | 1e-10 | 5.99e-09 | 4.48e-09 |

GSEA: Gene Set Enrichment Analysis.

### **Table S5. GSVA analysis results of TCGA-LIHC.**

|  | logFC | AveExpr | t | P.Value | adj.P.Val |
| --- | --- | --- | --- | --- | --- |
| HALLMARK_DNA_REPAIR | -0.521132148 | -0.029307063 | -12.47955862 | 8.43E-31 | 4.21E-29 |
| HALLMARK_TNFA_SIGNALING_VIA_NFKB | 0.560586271 | -0.021469335 | 12.38289642 | 2.06E-30 | 5.15E-29 |
| HALLMARK_XENOBIOTIC_METABOLISM | 0.578191415 | 0.01167253 | 11.52092775 | 5.15E-27 | 8.59E-26 |
| HALLMARK_INFLAMMATORY_RESPONSE | 0.511789761 | -0.00557134 | 11.45304306 | 9.43E-27 | 1.13E-25 |
| HALLMARK_MYC_TARGETS_V1 | -0.580054582 | -0.028502056 | -11.41892891 | 1.28E-26 | 1.13E-25 |
| HALLMARK_KRAS_SIGNALING_UP | 0.426874623 | 0.002908456 | 11.41184043 | 1.36E-26 | 1.13E-25 |
| HALLMARK_HYPOXIA | 0.399263859 | -0.009095682 | 11.23571756 | 6.44E-26 | 4.18E-25 |
| HALLMARK_COAGULATION | 0.529372843 | 0.010473853 | 11.23149489 | 6.68E-26 | 4.18E-25 |
| HALLMARK_ESTROGEN_RESPONSE_EARLY | 0.355090111 | 0.007273318 | 10.76224947 | 3.94E-24 | 1.97E-23 |
| HALLMARK_E2F_TARGETS | -0.605429905 | -0.039246457 | -10.76212488 | 3.95E-24 | 1.97E-23 |
| HALLMARK_ESTROGEN_RESPONSE_LATE | 0.324406581 | 0.01096607 | 10.63836869 | 1.14E-23 | 5.18E-23 |
| HALLMARK_IL2_STAT5_SIGNALING | 0.398405687 | -0.00827816 | 10.57845472 | 1.90E-23 | 7.90E-23 |
| HALLMARK_UNFOLDED_PROTEIN_RESPONSE | -0.42088559 | -0.039898681 | -10.56201614 | 2.18E-23 | 8.39E-23 |
| HALLMARK_KRAS_SIGNALING_DN | 0.312921984 | 0.046053609 | 10.53960576 | 2.64E-23 | 9.42E-23 |
| HALLMARK_COMPLEMENT | 0.387402295 | -0.001795298 | 10.06699233 | 1.38E-21 | 4.60E-21 |

GSVA: Gene Set Variation Analysis.

### **Table S6. Univariate and Multivariate Cox regression.**

| Characteristics | Total (N) | Univariate analysis | |  | Multivariate analysis | |
| --- | --- | --- | --- | --- | --- | --- |
| Hazard ratio (95% CI) | P value | Hazard ratio (95% CI) | P value |
| NAXE | 373 | 1.416 (1.120 - 1.789) | **0.004** |  | 1.389 (1.044 - 1.846) | **0.024** |
| NADSYN1 | 373 | 1.615 (1.112 - 2.344) | **0.012** |  | 1.270 (0.850 - 1.896) | 0.243 |
| NT5C | 373 | 1.302 (1.066 - 1.591) | **0.010** |  | 1.048 (0.827 - 1.327) | 0.700 |
| PNP | 373 | 1.389 (1.095 - 1.762) | **0.007** |  | 1.285 (0.987 - 1.674) | 0.063 |
| NT5E | 373 | 1.142 (0.976 - 1.335) | 0.097 |  | 1.187 (1.010 - 1.396) | **0.037** |
| NT5C3A | 373 | 1.582 (1.222 - 2.048) | **< 0.001** |  | 1.317 (0.985 - 1.763) | 0.064 |

CI, confidence interval.

Supplement Figures:


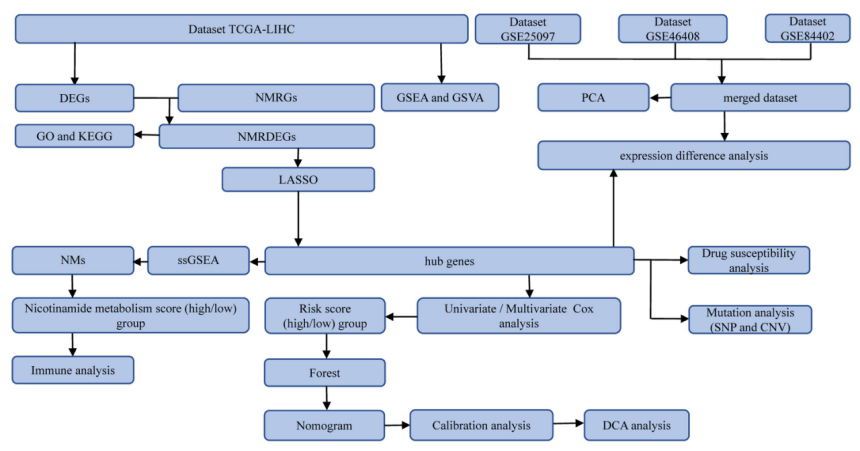


**Figure S1 Flowchart of the overall research.**

TCGA: The cancer genome atlas. LIHC: Liver hepatocellular carcinoma. DEGs : differentially expressed genes. NMRDEGs: Nicotinamide metabolism-related differentially expressed genes. NMRGs: Nicotinamide metabolism-related genes. GO: Gene Ontology. KEGG: Kyoto Encyclopedia of Genes and Genomes. GSEA: Gene Set Enrichment Analysis. GSVA: Gene Set Variation Analysis. LASSO: Least absolute shrinkage and selection operator. DCA: Decision curve analysis. ssGSEA: single-sample gene-set enrichment analysis. SNP: single nucleotide polymorphism. CNV: Copy number variation.


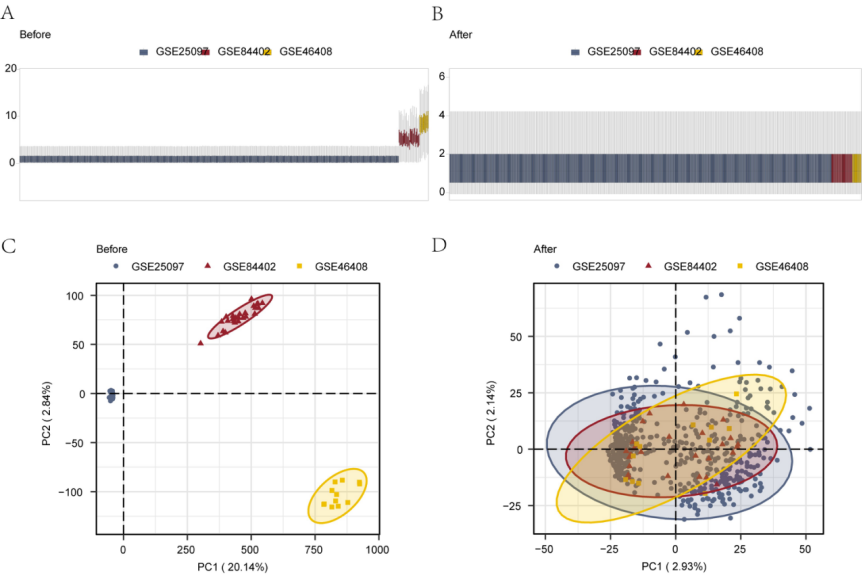


**Figure S2 The sample distribution boxplot and PCA diagram of the merged dataset before and after merging**

1. **-B.** The sample distribution of the merged dataset's boxplot. **C-D.** The PCA graph of merged dataset. PCA: principal component analysis.


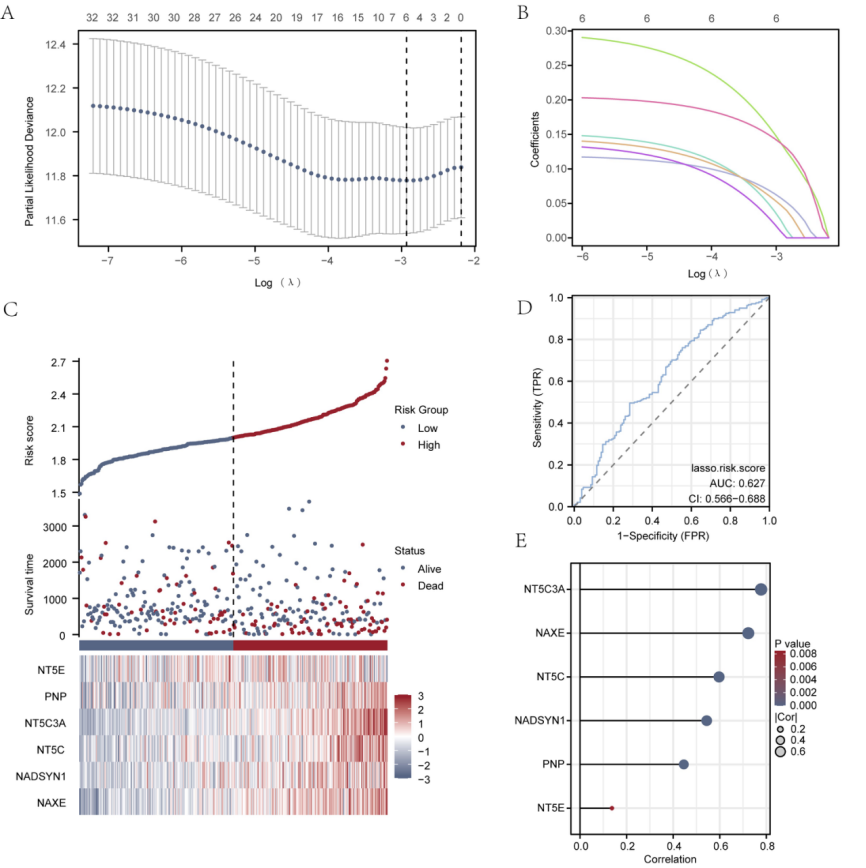


**Figure S3 Construction of LASSO regression model**

1. LASSO regression model diagram of NMRDEGs. **B.** Variable trajectory plot of the LASSO regression model. **C.** Display of the risk factor diagram results for NMRDEGs in the LASSO regression model. **D.** ROC curve of the LASSO regression model. **E.** Lollipop plots of correlations between NMRDEGs and LASSO regression models. LASSO: Least absolute shrinkage and selection operator. NMRDEGs: Nicotinamide metabolism-related differentially expressed genes. The risk factor map consists of two parts: 1. Risk grouping: the RiskScore obtained by predicting the Cox regression prognostic model is grouped by median. 2. Survival outcome: Use dot plots to display the survival time and status of the TCGA-LIHC clinical samples in the data set.


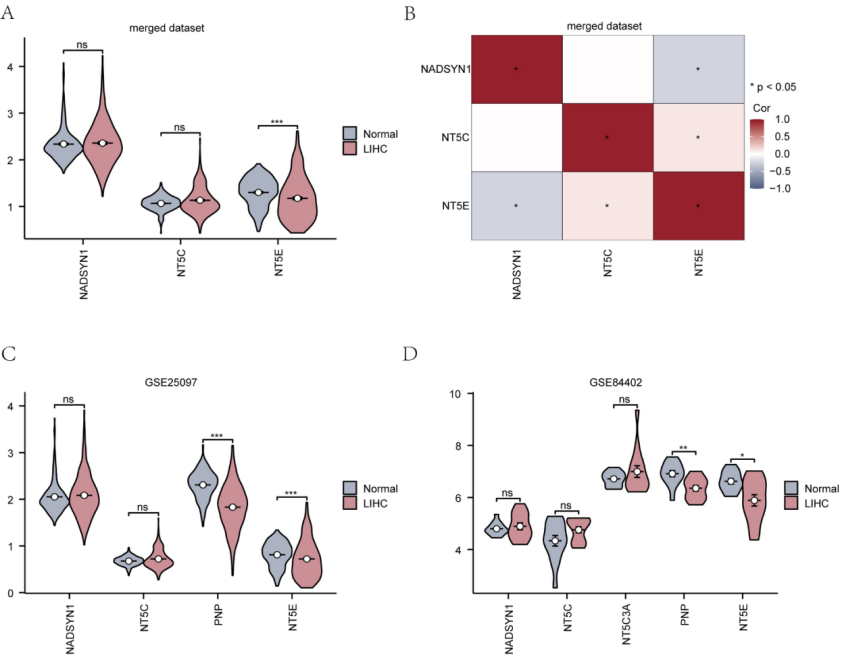


**Fig. S4 The expression of key genes in GEO dataset**

1. The grouping comparison chart results of key genes in different groups (Normal/LIHC) of the merge datasets. **B.** Display of the correlation heat map results of key genes in the merge datasets. **C.** The grouping comparison chart results of key genes in different groups (Normal/LIHC) of GSE25097. **D.** The grouping comparison chart results of key genes between different groups (Normal/LIHC) of GSE84402. * P < 0.05, ** P < 0.01, *** P < 0.001.


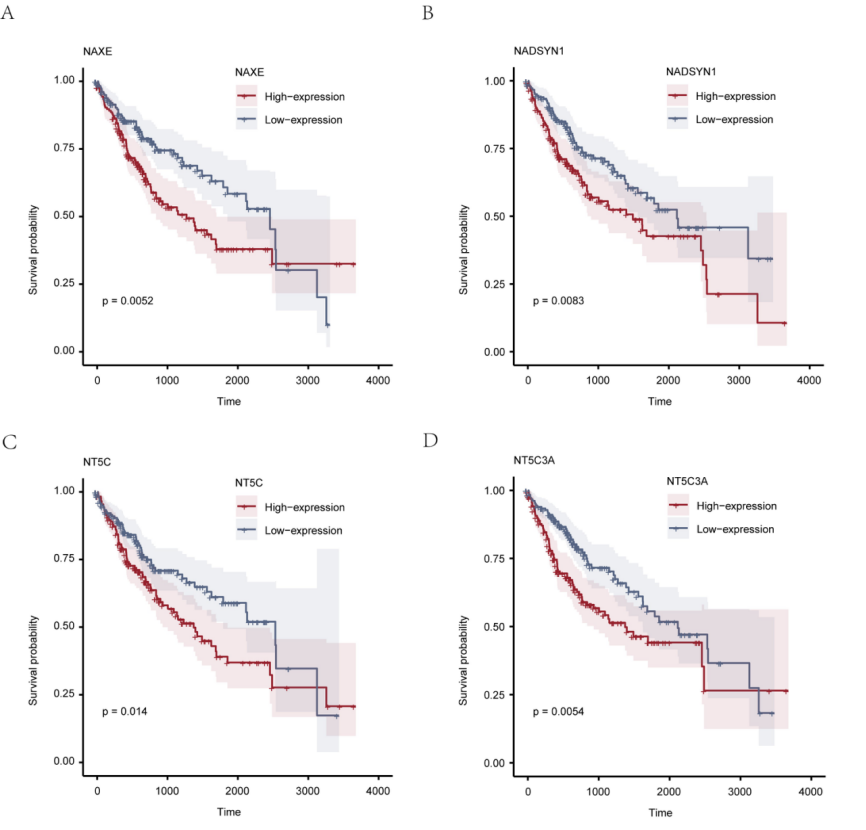


**Fig. S5 K-M curve analysis of the prognosis performance of key genes**

1. **-D.** Prognostic analysis of key genes KM curve. KM curve: Kaplan-Meier curve. P < 0.05 means statistically significant


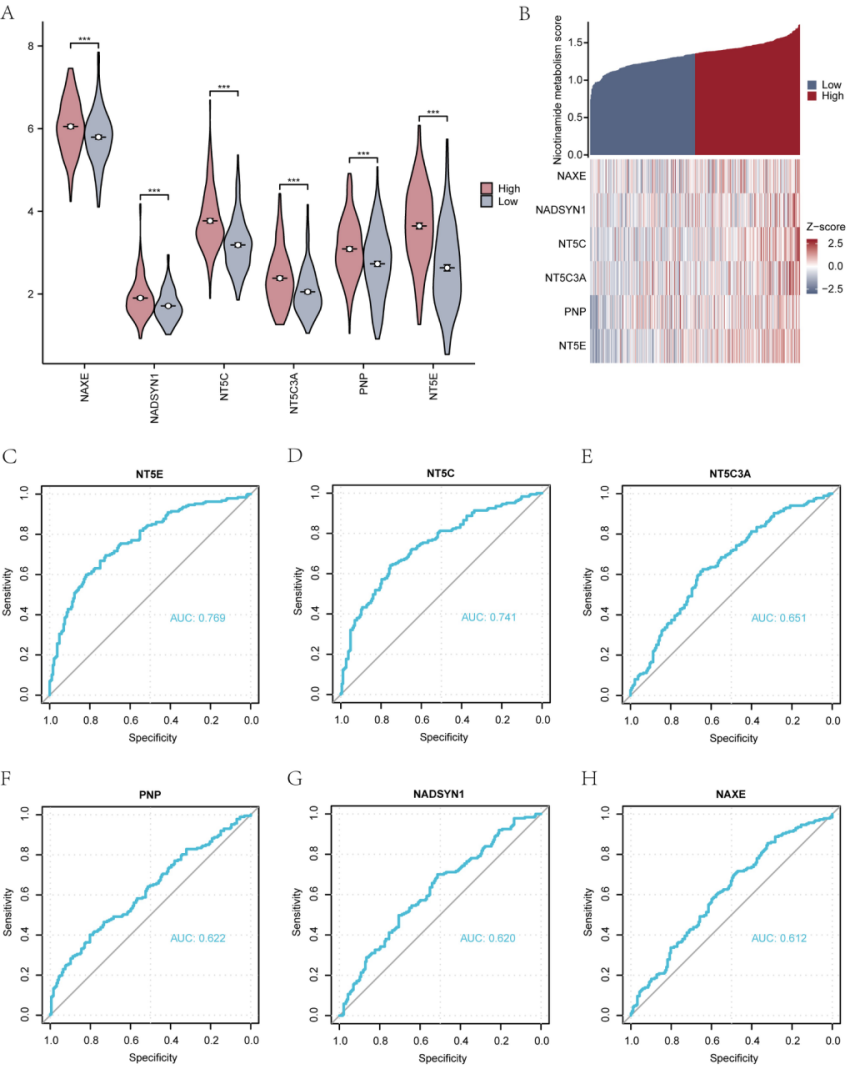


**Fig. S6 The expression of key genes in the high and low nicotinamide metabolism score (High/Low) group**

1. The group comparison chart between High/Low groups of the nicotinamide metabolism score of the key genes. **B.** The co-expression heatmap results of key genes. **C-H**. ROC curves for prediction models based on key genes NT5E (**C**), NT5C (**D**), NT5C3A (**E**), PNP (**F**), NADSYN1 (**G**), NAXE (**H**). *** P < 0.001. ROC: Receiver operating characteristic curve. AUC values closer to 1.0 signify better predictive performance of the model.
